# Supplementary material
Source: Springer Nature journal article supplement (https://www.springermedizin.de/resource/supplementary/13058_2013_3420_MOESM9_ESM.pdf/9704130)
Supplement: MOESM9 [file 9704130]

**A**

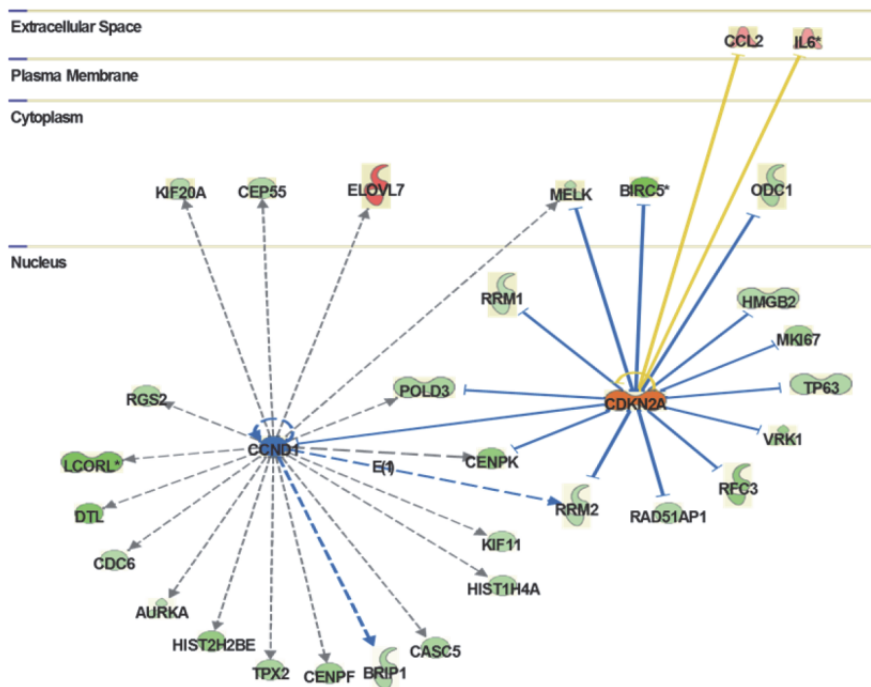

**B**

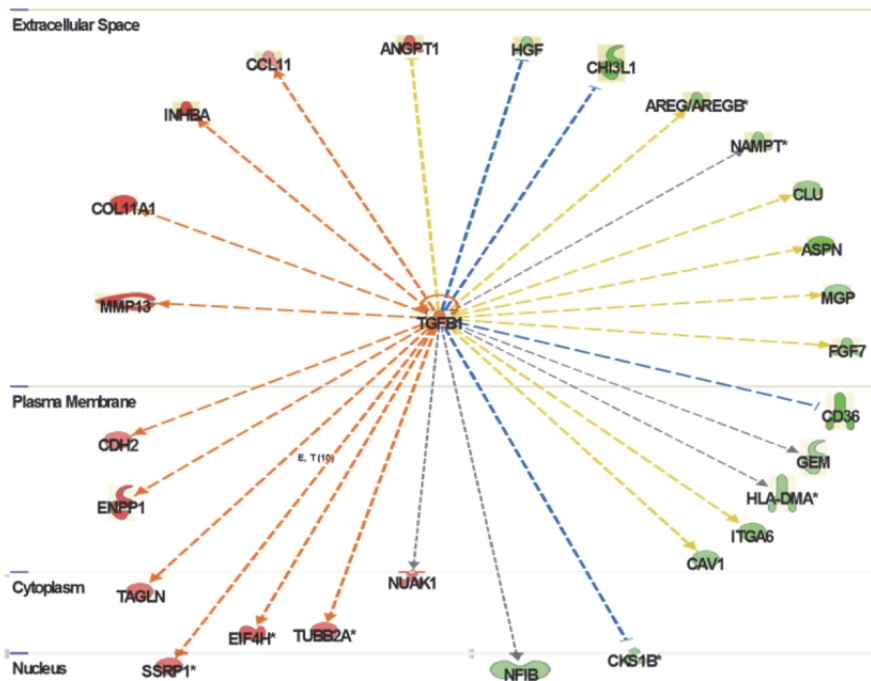

**Additional file 9: PHBECs in heterotypic *ex vivo* cultures are quiescent and hAMSCs show activated TGFβ1 signaling. (A) Downstream regulated targets of CCND1 and p16 (CDKN2A) in co-culture PHBECs displayed as networks. (B) Downstream regulated targets of TGFβ1 in co-culture hAMSCs displayed as networks. Orange shapes: active regulators, blue shapes: inactive regulators, Red shaded shapes: upregulated targets, Green shaded shapes: downregulated targets, grey lines: activity not predictable, yellow lines: activity contradictory.**
